# Supplementary material for: MEIS2 regulates endothelial to hematopoietic transition of human embryonic stem cells by targeting TAL1
Source: PubMed Central journal article supplement (PMC6286587; doi:10.1186/s13287-018-1074-z), 2018-12-07

A

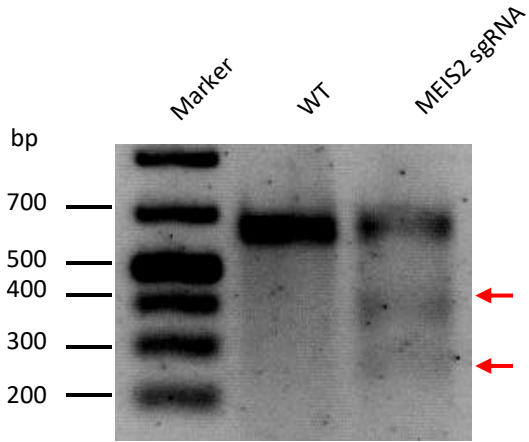

B

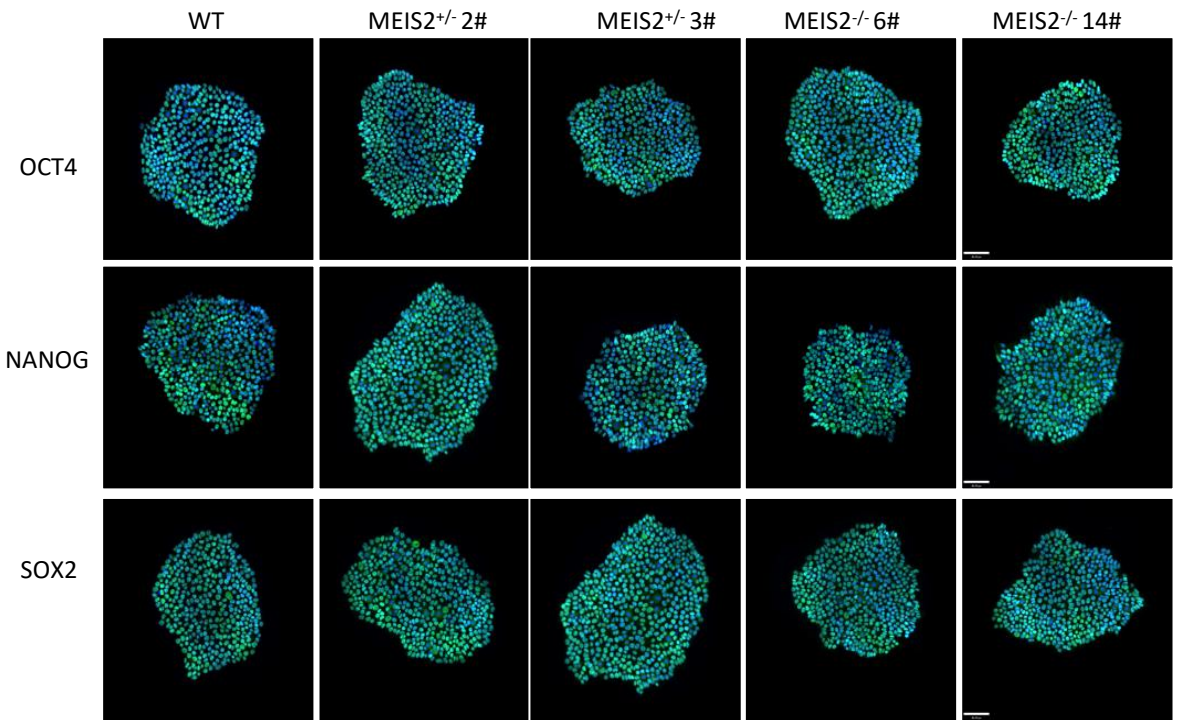

Supplement: 13287_2018_1074_MOESM1_ESM.pdf [file 13287_2018_1074_MOESM1_ESM.pdf]
